# Supplementary material for: Modulation of RNA processing genes during sleep-dependent memory
Source: eLife. 2024 Dec 6;12:RP89023. doi: 10.7554/eLife.89023 (PMC11623928; doi:10.7554/eLife.89023)
Supplement: Figure 2—figure supplement 1—source data 1. [file elife-89023-fig2-figsupp1-data1.xlsx]

## Sheet: A-P1F AI
R35B12>Wcs	R35B12>P1F RNAi	Wcs>P1F RNAi
0.788655	0.635386	0.833195
0.917912	0.458497	0.583823
1.5016	0.542024	0.845442
1.15187	0.570483	0.679966
0.856718	0.811207	0.645666
0.744772	0.704578	0.737873
1.00148	0.637248	0.947905
0.91486	0.516579	0.83357
0.778729	0.665576	0.6435
0.867612	0.642166	0.553108
0.971415	0.711405	0.596363
0.699397	0.73191	0.766575
1.24082	0.75084	0.796354
0.80854	0.418968	0.885633
0.938077	0.592626	0.652548
1.81754	0.835682	0.882752
1.12934	1.0488	0.975619
1.17951	0.961217	0.778847
1.07879	0.969218	0.804813
0.992543	0.697828	0.360979
0.920335	1.22472	0.517947
0.806542	0.98863	0.959062
0.566814	0.586899	0.664651
0.854683	0.783623	0.609622
1.64355	0.678788	0.661056
1.28488	1.17341	0.877007
0.891087	1.13379	0.859242
1.07106	1.01128	0.903836
0.762714	0.960074	1.06745
0.857066	1.08422	1.00263
1.05876		0.89779
0.902335		0.712383

## Sheet: B-Reg AI
R35B12>Wcs	R35B12>Reg1 RNAi	Wcs>Reg1 RNAi
1.02612	0.587315	1.80672
0.979695	1.26991	1.02639
0.715777	0.811526	1.49377
1.3699	0.884167	1.03417
0.583358	0.851645	2.97946
1.30154	1.20863	0.86466
1.3119	0.972147	1.90315
0.874461	0.821544	0.988903
1.01407	0.720987	2.14554
0.774355	1.07887	0.858584
0.774605	0.950463	2.42427
1.29019	0.938545	1.36874
0.869304	0.912188	2.16622
0.956013	1.0218	1.11031
0.732061	0.948764	2.93204
1.42666	1.27529	1.04305
0.854643	0.952888	1.41251
0.769164	1.24086	1.82013
1.18452	0.771644	1.33214
0.828547	0.909555	1.46393
0.998003	0.830188	0.922819
0.908733	1.05388	1.88881
1.02754	1.07536	1.43084
0.871617		1.38963
1.0795
1.09018
0.848419
1.21275
1.28626
1.37439
1.05074
0.614994

## Sheet: C-P1F LSE
R35B12>Wcs	R35B12>P1F RNAi	Wcs>P1F RNAi
16.638	686.667	34.0078
28.7205	36.1715	37.5059
12.5054	61.8312	40.9697
12.4482	252.588	22.3147
27.9143	146.739	50.4349
29.647	48.3825	22.5619
52.978	99.5333	38.5232
11.934	119.764	28.1931
17.1382	154.783	58.2169
21.5611	154.281	24.254
25.3001	61.5556	67.5344
24.5939	103.971	26.7821
11.8268	319.291	18.6191
21.0148	235	101.692
10.2505	66.4796	21.5022
20.0737	71.6806	46.1825
32.7563	93.859	28.6768
22.1485	51.0764	82.3
19.5898	22.7805	102.106
13.0476	397.7	102.913
19.783	41.3131	38.254
22.429	160.583	44.685
30.135	41.8828	16.2867
20.4927	54.4057	30.6512
63.1111	18.7685	18.4738
34.2744	129.108	45.865
260.888	44.3806	35.3023
19.5707	83.9518	28.6973
30.5886	24.0079	23.7564
14.9923	39.0894	8.18966
21.8597	48.3447
37.9242	182.722

## Sheet: D-Reg LSE
R35B12>Wcs	R35B12>Reg1 RNAi	Wcs>Reg1 RNAi
29.0175	19.092	95.5536
34.6886	27.6398	30.988
33.2575	12.4173	31.0445
35.6852	18.933	22.7672
23.4543	11.2427	152.75
32.2785	15.8122	28.9627
20.9838	16.6284	29.4007
34.8093	15.2609	31.1236
30.5604	31.8832	64.3977
32.5569	19.0621	63.3932
52.6243	23.7929	55.3611
34.7111	31.4377	39.8706
63.3674	53.5709	33.8631
56.08	22.5714	51.9
42.1737	18.3	118
38.2222	21.4107	20.351
21.4762	22.7222	14.12
31.8571	12.8636	72.875
17.35	5.55556	30.9375
11.6957	7.4375	121.2
16.7222	9.88235	47.9167
20.4	4.18182	103.667
15.1739	10.7826	37.1667
10.96		76.125
19.3684
13.2917
7.85185
37.1667
68.125
15.1429
24.5556
18.3571

## Sheet: E-P1F NSE
R35B12>Wcs	R35B12>P1F RNAi	Wcs>P1F RNAi
22.6667	1	15.3333
19	17	14.3333
23	10.6667	12.6667
24.3333	9.66667	19
19.3333	8	13
16.6667	11.3333	20.3333
13.6667	6.66667	12.6667
27	7.66667	17.6667
23.3333	8.33333	12
15.6667	6.33333	20.6667
18.6667	10.6667	12.3333
16	6.33333	18.3333
21	5.66667	23
19.6667	3	6.33333
25.6667	9	21.6667
18.3333	10	15.6667
16.6667	8.33333	12
17.3333	11	8
22.3333	23	6.33333
29.3333	2.66667	7.66667
22.6667	14.6667	13.3333
20.3333	6	15.3333
17.3333	13.6667	28.3333
23.3333	10.6667	17.6667
12.6667	25.6667	26.3333
21.6667	5.66667	13.6667
10.6667	12.3333	15.6667
20	8	17
21	19.6667	20.6667
24.3333	15.6667	26.6667
21.3333	13.3333
15.3333	5

## Sheet: F-Reg NSE
R35B12>Wcs	R35B12>Reg1 RNAi	Wcs>Reg1 RNAi
16.3333	16	8.66667
13.6667	15	16.6667
16.3333	20.3333	17.6667
13.3333	20	19.6667
20	19.3333	4
16.3333	13.6667	20.6667
17	21	18.3333
15	20.6667	19.6667
16.6667	14.6667	10
15.3333	17.6667	11
10.6667	19	10
13.6667	13.6667	12
10.3333	11	16.6667
10.6667	17.6667	11.6667
13.6667	17.3333	4
13.6667	20.3333	18.6667
21	18	25
14	22	8
20	27	16
23	16	5
18	17	12
20	11	6
23	23	12
25		8
19
24
27
12
8
21
18
28
