# Supplementary material for: Modulation of RNA processing genes during sleep-dependent memory
Source: eLife. 2024 Dec 6;12:RP89023. doi: 10.7554/eLife.89023 (PMC11623928; doi:10.7554/eLife.89023)
Supplement: Figure 3—figure supplement 1—source data 1. [file elife-89023-fig3-figsupp1-data1.xlsx]

## Sheet: B-Total sleep
R35B12-Gal4:TubGal80ts	R35B12-Gal4;TubGal80ts>Polr1F RNAi	UAS RNAi control		R35B12-Gal4:TubGal80ts	R35B12-Gal4;TubGal80ts>Polr1F RNAi	UAS RNAi control		R35B12-Gal4:TubGal80ts	R35B12-Gal4;TubGal80ts>Polr1F RNAi	UAS RNAi control		R35B12-Gal4:TubGal80ts	R35B12-Gal4;TubGal80ts>Polr1F RNAi	UAS RNAi control
716	727	781		298	957	660		693	998	749		1325	969	1270
669	723	941		651	1027	524		751	962	963		1069	1067	1106
629	781	964		370	790	360		757	815	934		1073	1011	1188
815	827	773		601	849	452		729	823	645		1375	988	1159
620	1115	1060		256	1323	894		643	1268	789		1074	1057	1369
1034	648	892		688	852	735		1082	1075	737		1303	989	1312
1170	829	624		667	1047	707		1107	1005	877		1395	995	1101
868	613	863		410	848	599		702	780	1057		1274	851	1163
704	828	683		184	921	640		370	917	1056		1287	1018	1144
648	744	963		479	881	746		665	966	877		1198	995	1247
673	745	721		297	912	569		657	922	935		1281	936	1311
619	881	921		413	886	688		406	876	751		1293	942	1182
853	716	935		354	965	635		692	922	820		1326	962	1249
788	662	773		695	824	697		959	991	784		1060	887	1059
694	803	1021		409	933	708		680	932	967		1053	934	1244
794	827	1031		596	974	669		866	981	876		1395	943	1117
636	772	791		225	877	719		468	970	884		1276	964	953
539	824	779		328	965	779		422	925	986		1213	1002	1235
900	814	744		642	904	572		858	917	695		1328	950	1038
918	756	896		568	895	550		926	805	644		1302	927	1253
1038	913	543		818	982	550		1196	925	788		1362	922	1062
474	713	845		251	848	645		492	911	698		1230	912	1185
739	682	636		581	857	618		988	877	825		1319	900	1149
716	767	926		598	925	665		750	913	864		1205	885	1217
773	813	808		623	889	755		823	924	772		1234	884	1104
671	698	929		582	722	679		602	839	788		778	932	1101
1116	651	780		490	727	745		793	891	909		1348	993	1047
871	828	776		706	823	645		877	913	885		1220	872	1170
619	943	658		323	844	707		632	863	766		1171	920	863
816	732	554		356	1002	752		560	928	879		1101	880	1173
738	808	631		692	775	902		985	912	956		819	977	1111
794	857	614		761	694	453		680	861	643		785	1079	1100
1012	978	894		747	1031	1016		875	1055	1093		1024	970	972
1381	1004	780		1175	1148	948		1087	1187	1186		1398	1012	980
924	734	828		788	960	774		1034	793	982		976	901	766
755	966	846		1044	1039	874		1007	1092	871		980	781	1145
924	857	802		943	1105	668		963	973	1042		1087	893	1049
863	503	839		772	918	862		1048	1108	861		960	721	1015
802	860	1033		628	1068	1053		898	1033	1176		930	979	908
967	960	755		752	924	977		981	978	1046		901	681	929
849	868	1012		977	1109	1039		1111	1192	1185		910	788	1025
817	831	933		911	947	942		1052	1076	1002		961	880	1092
922	942	890		887	1060	1043		1002	1281	1044		979	924	1162
803	725	892		949	1014	986		918	1091	965		807	814	1083
772	1024	850		793	1198	809		889	1305	1043		956	1035	981
943	819	1136		952	1145	1083		996	1132	1105		849	999	1053
	816	809			1148	684			1257	779			1085	986
	1018	1007			1046	1022			1122	1032			889	1091

## Sheet: C-First 3h
R35B12-Gal4:TubGal80ts	R35B12-Gal4;TubGal80ts>Polr1F RNAi	UAS RNAi control		R35B12-Gal4:TubGal80ts	R35B12-Gal4;TubGal80ts>Polr1F RNAi	UAS RNAi control		R35B12-Gal4:TubGal80ts	R35B12-Gal4;TubGal80ts>Polr1F RNAi	UAS RNAi control		R35B12-Gal4:TubGal80ts	R35B12-Gal4;TubGal80ts>Polr1F RNAi	UAS RNAi control
1	27	13		1	86	22		31	43	0		162	79	116
0	12	0		15	61	28		2	47	15		67	62	93
2	29	48		1	24	20		14	12	2		30	40	99
11	28	24		20	52	15		45	16	4		160	40	96
0	53	57		0	125	77		4	104	74		148	71	125
31	3	8		17	75	30		19	37	1		173	71	149
125	22	0		52	105	35		66	7	3		179	44	80
19	0	17		18	36	10		11	0	0		138	16	63
8	8	16		4	17	54		2	26	7		128	15	83
2	0	22		0	53	64		0	7	14		74	29	91
2	1	31		0	42	11		4	10	0		140	95	73
3	33	50		0	71	74		0	26	49		123	41	96
104	24	27		22	81	20		113	18	0		179	62	75
19	0	2		0	64	40		13	31	2		133	42	67
20	15	29		4	74	56		26	52	2		28	46	89
0	41	74		0	54	72		20	26	20		21	27	64
19	5	50		12	70	72		3	7	7		163	5	37
34	8	11		4	107	49		2	8	22		121	48	96
175	5	10		179	88	44		179	27	23		179	31	58
0	0	42		12	41	43		0	10	0		70	41	121
42	15	0		11	81	16		22	35	0		148	22	96
11	0	2		14	66	49		41	32	0		97	14	86
67	3	2		15	73	25		79	16	12		138	40	69
0	3	51		0	67	38		1	12	15		34	9	80
0	33	3		0	59	27		40	12	0		130	2	56
0	1	59		0	29	104		17	23	33		114	40	74
14	0	24		0	88	11		10	9	14		84	18	36
5	5	2		1	75	34		4	36	3		2	29	24
91	63	0		18	49	15		19	18	0		158	29	47
11	0	1		12	81	61		12	38	33		118	13	126
0	10	9		0	49	45		5	61	12		97	53	76
23	16	2		10	80	49		4	8	0		76	48	48
46	74	84		54	99	81		23	52	52		9	32	6
36	84	16		62	127	68		12	42	20		16	54	73
111	28	65		76	78	88		39	43	14		31	28	0
131	107	97		120	56	55		70	75	25		148	13	124
72	67	28		43	99	55		34	12	55		4	0	99
28	0	44		79	37	76		40	31	21		21	0	68
89	63	78		80	85	103		35	37	54		40	37	62
80	69	37		59	67	110		15	65	16		46	0	64
10	70	113		53	81	120		0	34	64		0	12	72
85	5	88		38	57	59		6	79	22		14	30	89
47	62	68		34	89	115		21	129	33		37	27	144
40	8	45		54	72	95		17	36	29		49	0	34
18	65	62		55	121	45		1	100	4		44	81	42
28	58	156		85	147	174		0	113	55		0	37	100
26	20	49		49	98	81		0	114	19		7	41	43
91	86	86		51	87	110		3	67	37		5	19	51
