# Supplementary material for: Modulation of RNA processing genes during sleep-dependent memory
Source: eLife. 2024 Dec 6;12:RP89023. doi: 10.7554/eLife.89023 (PMC11623928; doi:10.7554/eLife.89023)
Supplement: Figure 3—figure supplement 2—source data 1. [file elife-89023-fig3-figsupp2-data1.xlsx]

## Sheet: B-First 3h
RU-	RU+
6	10
18	4
2	12
2	2
2	2
2	2
48	3
2	2
8	6
2	2
2	2
2	2
2	4
2	3
2	2
2	2
2	2
2	2
32	6
1	15
7	21
12	20
	11
	30

## Sheet: D-Total sleep
RU-	RU+
347.333	445.333
419.667	205.667
632.333	155
217	371.333
441.667	598.333
521.667	465.333
714.667	451.667
505.333	539.667
455.333	629.333
293.333	550.333
110.333	584.667
801	622
549	833
467.333	843
607.333	536
315.333	342.333
374.667	480.667
381.667	597
659.5	557.5
618	504.5
484	461.5
630.5	587
457.5	442
644.5	524
521	444
741.5	463
501	667
206.5	295
