# Supplementary material for: Modulation of RNA processing genes during sleep-dependent memory
Source: eLife. 2024 Dec 6;12:RP89023. doi: 10.7554/eLife.89023 (PMC11623928; doi:10.7554/eLife.89023)
Supplement: Figure 3—figure supplement 3—source data 1. [file elife-89023-fig3-figsupp3-data1.xlsx]

## Sheet: B-Regnase-1
R35B12-Gal4:TubGal80ts	R35B12-Gal4;TubGal80ts>Regnase-1 RNAi	UAS RNAi control		R35B12-Gal4:TubGal80ts	R35B12-Gal4;TubGal80ts>Regnase-1 RNAi	UAS RNAi control		R35B12-Gal4:TubGal80ts	R35B12-Gal4;TubGal80ts>Regnase-1 RNAi	UAS RNAi control		R35B12-Gal4:TubGal80ts	R35B12-Gal4;TubGal80ts>Regnase-1 RNAi	UAS RNAi control
716	604	716		298	601	664		693	741	766		1325	772	1192
669	686	879		651	569	444		751	788	482		1069	1016	1330
629	519	666		370	436	576		757	592	641		1073	814	888
815	777	805		601	558	471		729	747	300		1375	932	1020
620	650	817		256	626	719		643	965	411		1074	1212	1006
1034	622	734		688	505	401		1082	662	293		1303	716	937
1170	654	747		667	382	405		1107	472	276		1395	840	1067
868	932	845		410	585	775		702	651	759		1274	888	939
704	680	844		184	489	529		370	417	652		1287	1004	1219
648	758	608		479	838	515		665	1030	317		1198	1091	927
673	738	631		297	538	561		657	500	412		1281	880	1017
619	697	643		413	508	276		406	475	285		1293	922	716
853	831	706		354	686	512		692	633	315		1326	1004	1039
788	747	687		695	340	721		959	596	868		1060	1023	1150
694	618	745		409	983	576		680	1045	252		1053	1159	925
794	915	588		596	780	179		866	762	104		1395	1023	671
636	901	707		225	578	301		468	628	217		1276	1191	743
539	722	699		328	672	268		422	772	329		1213	988	837
900	511	736		642	147	252		858	223	400		1328	908	1008
918	443	903		568	618	610		926	808	354		1302	1159	1005
1038	654	765		818	651	337		1196	539	451		1362	1100	829
474	768	734		251	623	457		492	704	427		1230	1043	970
739	842	697		581	747	466		988	885	267		1319	1090	1157
716	644	779		598	441	433		750	702	284		1205	1040	888
773	557	838		623	481	537		823	701	266		1234	1050	1145
671	531	657		582	525	359		602	816	419		778	1090	849
1116	443	795		490	574	366		793	514	487		1348	995	972
871	872	880		706	460	669		877	604	301		1220	985	970
619	544	675		323	438	324		632	675	470		1171	1022	815
816	837	629		356	643	396		560	684	178		1101	1081	794
738	691	668		692	945	217		985	783	153		819	620	684
794	1024	704		761	984	404		680	1056	258		785	875	911
1012	806	576		747	919	915		875	894	966		1024	588	923
1381	688	839		1175	767	843		1087	924	850		1398	692	1052
924	679	835		788	990	747		1034	823	984		976	575	1006
755	876	990		1044	677	971		1007	953	1040		980	773	1055
924	829	866		943	707	956		963	895	1005		1087	711	1036
863	557	819		772	617	840		1048	580	976		960	583	859
802	835	648		628	948	706		898	1033	777		930	675	1033
967	837	675		752	973	627		981	1005	695		901	845	623
849	749	954		977	533	838		1111	777	1005		910	768	996
817	897	696		911	1017	810		1052	1017	867		961	938	906
922	564	574		887	627	888		1002	618	869		979	746	827
803	748	780		949	745	792		918	839	916		807	728	866
772	803	719		793	992	879		889	867	998		956	715	974
943	860	826		952	957	857		996	930	831		849	824	781
		991				961				1042				1054
		952				993				1031				955
