# Supplementary material for: Modulation of RNA processing genes during sleep-dependent memory
Source: eLife. 2024 Dec 6;12:RP89023. doi: 10.7554/eLife.89023 (PMC11623928; doi:10.7554/eLife.89023)
Supplement: Figure 3—figure supplement 4—source data 1. [file elife-89023-fig3-figsupp4-data1.xlsx]

## Sheet: A-P1F
R35B12-Gal4:TubGal80ts	R35B12-Gal4;TubGal80ts>Polr1F RNAi	UAS RNAi control		R35B12-Gal4:TubGal80ts	R35B12-Gal4;TubGal80ts>Polr1F RNAi	UAS RNAi control		R35B12-Gal4:TubGal80ts	R35B12-Gal4;TubGal80ts>Polr1F RNAi	UAS RNAi control		R35B12-Gal4:TubGal80ts	R35B12-Gal4;TubGal80ts>Polr1F RNAi	UAS RNAi control
28	42	56			80	42		52	70	61		18	28	14
38	25	28		40	56	56		56	46	51		16	28	22
53	64	51			58	88		59	56	86		27	17	28
33	30	50		45	88	56		37	80	60		11	31	42
28	33	28			54	28		83	67	17		51		14
27	42	29		42	101	51		47	77	45		14		14
16	53	28			64	76		30	56	120		9	30	32
34	28	82		59	70	80		40	61	59		20	27	14
34	43	28			60	73		49	61	60		14	26	32
43	28	36		65	58	73		42	38	54		17	19	15
28	28	96			45	69		55	54	74		25	28	32
40	28	37		58	77	42		42	65	43		26	22	28
14	31	49			63	66		13	51	63		8	28	28
40	30	32		76	72	56		37	67	42		17	28	23
12	47	42			73	52		15	66	42		12	32	14
24	28	42		159	78	58		98	56	78		24	21	14
24	39	49		48	72	86		39	65	83		16	27	30
53	31	24		66	94	56		49	58	68		33	29	18
7	36	54		0	88	61		0	79	61		0	27	26
46	30	27		54	56	48		37	47	61		23	19	25
50	32	49		32	79	92		31	62	103		17	31	18
28	50	39		34	81	70		29	69	66		19	41	44
24	43	38		31	77	70		23	75	60		14	22	28
48	33	46		78	56	66		90	56	56		27	42	21
28	32	37		30	56	65		36	54	57		15	26	27
40	24	39		50	54	70		53	49	83		28	22	26
42	26	51		94	54	82		56	53	80		28	17	25
36	27	40		46	78	78		84	47	75		23	33	20
28	35	58		34	80	54		31	70	39		14	28	80
27	39	36		56	75	87		48	68	37		39	29	20
47	33	48		47	76	50		42	79	56		25	28	36
42	34	52		42	40	58		42	42	62		32	30	20
50	76	46		35	72	56		50	65	48		47	52	52
56	59	47		52	75	63		35	76	47		53	36	42
37	39	62		57	69	76		55	67	107		37	34	43
28	41	50		33	65	64		31	53	56		28	48	45
32	63	34		36	93	92		28	93	53		49	65	30
54	52	46		42	84	80		34	92	68		45	42	32
29	38	51		51	56	70		29	67	64		32	46	45
53	41	48		45	88	70		40	81	61		41	44	26
30	51	37		90	54	66		44	56	57		36	33	56
36	42	51		36	75	87		51	54	63		59	41	33
27	64	35		31	82	56		40	67	46		43	35	50
48	71	57		42	72	56		37	62	68		37	45	50
34	49	58		65	67	67		59	70	82		50	49	53
25	66	34		58	94	65		74	77	66		31	52	27
51	39	48		30	84	94		45	53	67		41	56	37
43	50	37		48	70	79		34	75	56		48	33	28

## Sheet: B-Regnase-1
R35B12-Gal4:TubGal80ts	R35B12-Gal4;TubGal80ts>Regnase-1 RNAi	UAS RNAi control		R35B12-Gal4:TubGal80ts	R35B12-Gal4;TubGal80ts>Regnase-1 RNAi	UAS RNAi control		R35B12-Gal4:TubGal80ts	R35B12-Gal4;TubGal80ts>Regnase-1 RNAi	UAS RNAi control		R35B12-Gal4:TubGal80ts	R35B12-Gal4;TubGal80ts>Regnase-1 RNAi	UAS RNAi control
28	35	57			40	58		52	65	49		18	25	26
38	28	40		40	42	49		56	48	48		16	28	25
53	49	40			82	39		59	66	80		27	19	77
33	28	36		45	68	56		37	46	56		11	26	18
28	28	31			46	48		83	27	63		51	142	28
27	34	72		42	82	74		47	88	56		14	28	19
16	28	34			41	51		30	39	40		9	25	18
34	38	38		59	57	51		40	46	60		20	28	18
34	37	42			53	53		49	45	82		14	28	23
43	35	42		65	48	93		42	30	37		17	22	28
28	37	36			45	40		55	37	34		25	28	14
40	30	28		58	48	56		42	45	55		26	23	22
14	32	51			80	74		13	24	51		8	18	28
40	33	60		76	53	48		37	46	46		17	28	27
12	33	39			29	48		15	23	43		12	19	55
24		67		159		72		98		56		24		28
24	37	59		48	44	49		39	43	52		16	28	33
53	35	42		66	46	55		49	37	54		33	31	34
7	30	50		0	39	52		0	42	66		0	30	52
46	33	40		54	67	42		37	59	57		23	28	33
50	42	53		32	65	60		31	51	56		17	19	42
28	33	43		34	50	61		29	39	37		19	20	20
24	42	68		31	56	112		23	30	86		14	28	41
48	28	52		78	42	64		90	61	68		27	28	24
28	28	34		30	49	42		36	42	59		15	26	28
40	33	42		50	57	70		53	45	49		28	26	23
42	44	46		94	56	51		56	46	53		28	28	44
36	38	34		46	57	53		84	62	42		23	28	22
28	40	44		34	40	60		31	69	69		14	26	46
27	43	45		56	53	96		48	46	85		39	40	51
47	34	45		47	19	58		42	13	72		25		37
42	34	46		42	32	64		42		52		32		27
50	47	46		35	57	61		50	48	49		47	53	39
56	50	159		52	63	78		35	32	61		53	46	144
37	50	40		57	56	56		55	59	48		37	47	39
28	53			33	47	40		31	48	41		28	35
32	39	56		36	38	68		28	57	53		49	47	42
54	50			42	66	94		34	53	29		45	44
29	47	40		51	42	70		29	48	41		32	41	41
53	41			45	62	100		40	53	42		41	28
30	46	49		90	33	55		44	35	44		36	32	41
36	51			36	43	135		51	45	39		59	55
27	51	47		31	65	55		40	63	70		43	46	31
48	46			42	51			37	33	44		37	65
34	47	47		65	69	67		59	50	51		50	36	40
25	58			58	47	153		74	42	68		31	23
51	49	40		30	40	46		45	38	43		41	41	37
43	43			48	49	114		34	43	45		48	28
