# Supplementary material for: Modulation of RNA processing genes during sleep-dependent memory
Source: eLife. 2024 Dec 6;12:RP89023. doi: 10.7554/eLife.89023 (PMC11623928; doi:10.7554/eLife.89023)
Supplement: Figure 4—figure supplement 1—source data 1. [file elife-89023-fig4-figsupp1-data1.xlsx]

## Sheet: A-qPCR
>64553
RU-	RU+
0.98	0.42
0.78	0.46
1.27	0.36
>103392
RU-	RU+
1.04	0.36
1.19	0.35
0.81	0.59
>27330
RU-	RU+
1.4	0.46
0.72	0.45
1	0.215

## Sheet: B-Reg OE
R35B12>Wcs	Wcs>Reg1 OE	R35B12>Reg1 OE
347	763	563.333
468.333	638.333	595.333
428	904.667	714.667
696.333	766	723.333
362	803	581.333
351.333	691.333	544.333
604	806.667	643.333
304.667	818	601
410.333	676	482.667
759.333	791.333	356.333
245	602.333	726.667
401	781	709.667
517.333	685.333	618.333
444.333	731.667	784
589.333	631.667	532
359.667	734.333	658
709.333	783	643.333
646.333	666	619
683	792.333	633.333
582	750	640.333
743.667	730.667	675.333
476	717.333	744.333
649.333	709	663.333
569.667	780.333	540.667
561	770.333	393
676.333	678	690
470.333	658.333	632
660.333	623.667	625.667
638.333	806.333	653.667
439.667	704.667	698.667
700	790.333	701.333
390		805.667
