# Supplementary material for: Modulation of RNA processing genes during sleep-dependent memory
Source: eLife. 2024 Dec 6;12:RP89023. doi: 10.7554/eLife.89023 (PMC11623928; doi:10.7554/eLife.89023)
Supplement: Figure 5—figure supplement 1—source data 1. [file elife-89023-fig5-figsupp1-data1.xlsx]

## Sheet: A-fed female
Vehicle	0.2mM CX-5461
115	146
130	123
177	186
189	91
209	161
145	44
202	142
190	73
227	152
62	143
152	67
163	72
110	150
158	80
150	141
120	111
70	147
68	100
2	22
180	119
41	113
47	120
22	130
34	47
68	49
27	34
8	109
137	192
2	37
69	43
82	42
34	40

## Sheet: B-fed male
Vehicle	0.2mM CX-5461
186	192
171	154
185	75
194	127
106	66
2	175
81	122
93	130
135	64
108	155
156	120
111	121
158	132
145	127
80	194
148	204
98	13
119	42
108	13
72	100
3	55
85	81
50	95
74	63
124	9
161	52
143	54
99	106
137	132
239	34
48	91
58	123

## Sheet: C-starved female
Vehicle	0.2mM CX-5461
106	211
69	102
122	160
68	102
105	227
88	70
95	136
85	197
123	115
57	142
98	94
150	2
149	65
159	142
54	176
117	71
99	142
129	31
179	67
134	26
121	141
38	2
125	175
62	130
138	137
158	119
157	88
129	58
161	95
92	214
133	191
239	239

## Sheet: D-starved male
Vehicle	0.2mM CX-5461
65	132
16	9
127	131
103	176
69	152
70	201
125	31
181	17
61	128
2	106
127	164
2	12
121	66
12	71
72	149
6	73
137	92
112	66
106	109
131	47
50	138
76	147
119	107
129	6
147	72
57	170
127	67
120	31
89	57
137	70
25	124
229	115
